# Supplementary material
Source: Research Square preprint supplement (doi:10.21203/rs.3.rs-9115080/v1)
Supplement: Supplementary file 1 [file 152ed82c85278534f187eaf2.pdf]

## **Interview and Focus Group Discussion Guidelines**

### ***Research Project: Development of a Model of Preparation for Entering Elderly Age by the Community***

#### **PART A: GUIDELINES FOR IN-DEPTH INTERVIEW**

**Informants:** Individuals preparing to enter elderly age, aged 50–59 years

**Objective:** To understand the events and situations that lead to preparations for entering elderly age among target groups and the community's management of such processes.

**Procedure:**

1. Introduce yourself.
2. Explain the objectives of the study and the benefits to be gained.
3. Request permission to collect data and inform the informant of their rights.
4. Request permission to record the session.

**Interview Questions:**

1. Who do you currently live with? What is your occupation? What is your monthly income? How is your health status?
2. What are your thoughts and beliefs regarding preparation for entering elderly age?
3. Have you made preparations to become a quality older person? If so, how? For example: preparing your physical health, financial preparedness, engaging in social activities, and adapting your living environment to support aging, etc.
4. What have been the outcomes of your preparations for entering elderly age?
5. Do you think the community should play a role in promoting preparation for entering elderly age? If so, how?
6. If you were to receive support from the community to help you take better care of yourself, what suggestions would you have?

## **PART B: GUIDELINES FOR FOCUS GROUP DISCUSSION**

**Informants:** Community leaders and those involved in preparation for elderly age, including: Village Health Volunteers (VHV), Elderly Care Volunteers (ECV), Sub-district Chiefs (Kamnan), Village Headmen (Phu Yai Ban), Elderly Leaders, Savings Group Leaders, Local Administrative Organization (LAO) representatives, Sub-district Health Promoting Hospitals (SHPH), Occupational Group Leaders, Elderly Club Presidents, and Volunteer Groups.

**Objective:** To understand the events and situations that lead to preparations for entering elderly age; the tasks/activities undertaken; factors related to preparation such as people, information, and resources; outcomes; and success conditions for elderly preparation.

### **Procedure:**

1. Introduce yourself.
2. Explain the objectives of the study and the benefits to be gained.
3. Request permission to collect data and inform informants of their rights.
4. Request permission to record the session.

### **Discussion Questions:**

1. What are your thoughts and beliefs regarding preparation for entering elderly age?
2. What situations or events have led to preparations for entering elderly age? What significant changes have occurred during the past period of elderly care by volunteers?
3. How do you think the community should play a role in promoting preparation for entering elderly age?
4. What are your roles and responsibilities in the preparation for entering elderly age? How is each task carried out?
5. Who else is involved in the preparation for entering elderly age, and what are their roles? In the community where you work together, who excels at what, and how do they help achieve successful outcomes?
6. What do you think about the support and promotion of preparation for entering elderly age?
7. In your community, which individuals, social groups, or organizations support the work of and preparation for elderly care? What are their roles?
8. What have been the outcomes of preparing for elderly age? What has occurred as a result?
9. Who are the beneficiaries, and what impact has occurred for those who have benefited?
10. What do you think are the key factors in preparing for elderly age? If improvements were to be made, what would you suggest should be done?
